# Supplementary material for: The role of motivation in literacy assessment: using item-level analyses to inform college placement for multilingual learners
Source: Frontiers journal article supplement (doi:10.3389/feduc.2025.1521482), 2025-04-28
Supplement: Data_Sheet_1.pdf [file Data_Sheet_1.pdf]

**Table S1***Languages Spoken by Multilingual Learners*

| Region                       | Language         | Count |
|------------------------------|------------------|-------|
| South Asia                   | Bengali          | 1     |
|                              | Gujarati         | 1     |
|                              | Hindi            | 1     |
|                              | Urdu             | 1     |
|                              | Total            | 4     |
| Southeast Asia               | Filipino/Tagalog | 2     |
|                              | Vietnamese       | 3     |
|                              | Total            | 5     |
| East Asia                    | Korean           | 1     |
|                              | Mandarin         | 1     |
|                              | Total            | 2     |
| Middle East and North Africa | Arabic           | 4     |
|                              | Harari           | 2     |
|                              | Total            | 6     |
| Europe                       | German           | 1     |
|                              | Slovenian        | 1     |
|                              | Total            | 2     |
| French (Region unspecified)  |                  | 1     |
| Spanish (Region unspecified) |                  | 19    |

**Table S2***Correlations among the Variables by English Experience Group*

| Variable                         | 1    | 2     | 3      | 4      | 5      | 6      |
|----------------------------------|------|-------|--------|--------|--------|--------|
| 1. Year College                  | –    | .04   | .12    | .14**  | .13**  | .12    |
| 2. High Reading Confidence       | .11  | –     | .26*** | .08    | .02    | .06    |
| 3. High Reading Enjoyment        | -.02 | .24   | –      | .11    | .03    | .08    |
| 4. GM Vocab Low Frequency Score  | .08  | .27   | .04    | –      | .70*** | .96*** |
| 5. GM Vocab High Frequency Score | .27  | .42** | .05    | .68*** | –      | .86*** |
| 6. GM Vocab Total Score          | .16  | .32*  | .04    | .94*** | .86*** | –      |
| 7. English Exposure              | .31  | .05   | -.39** | .06    | -.11   | -.02   |

*Note.* Correlations are significant at  $p < .001$ ; \*  $p < .05$ ; \*\*\*  $p < .001$ ; College students identified as *multilingual learners* are below the diagonal. College

students identified as *monolingual English speakers* are above the diagonal. GM = Gates-MacGinitie Reading Vocabulary assessment

**Table S3***Model Fit Comparisons for Models Predicting Missing Responses*

| Model                         | Deviance | LL       | AIC     | BIC     | Likelihood Ratio Test |              |             |           |            |
|-------------------------------|----------|----------|---------|---------|-----------------------|--------------|-------------|-----------|------------|
|                               |          |          |         |         | df residual           | $\lambda LR$ | $\Delta df$ | P - value | Comparison |
| Null Model                    | 2208.70  | -1103.30 | 2208.70 | 2215.30 | 5471                  |              |             |           |            |
| Fixed Effect Model            |          |          |         |         |                       |              |             |           |            |
| Item Number ( $\gamma_{10}$ ) | 1828.20  | -914.10  | 1832.20 | 1845.40 | 5470                  |              | 1           | < .001    | Null Model |

Note. Dev. = Deviance; LL = Log Likelihood; AIC = Akaike Information Criterion; BIC = Bayesian Information Criterion; df residual = residual degrees of freedom;  $\lambda LR$  = likelihood ratio statistic;  $\Delta df$  = change in degrees of freedom relative to the comparison model;

**Table S4***Model Results of Item Number Predicting Item Missingness*

|                                    | Estimate | SE  | OR   | 95% CI |       | P-value |
|------------------------------------|----------|-----|------|--------|-------|---------|
|                                    |          |     |      | lower  | upper |         |
| Null Model                         |          |     |      |        |       |         |
| Random Effect                      |          |     |      |        |       |         |
| Person variance ( $\tau_{00 ID}$ ) | 66.11    | .34 |      |        |       |         |
| Fixed Effect Model                 |          |     |      |        |       |         |
| Fixed Effect                       |          |     |      |        |       |         |
| Item Number ( $\gamma_{10}$ )      | .35      | .03 | 1.42 | 1.35   | 1.49  | < .001  |
| Random Effect                      |          |     |      |        |       |         |
| Person variance ( $\tau_{00 ID}$ ) | 360.60   | .79 |      |        |       |         |

Note. SE = Standard Error; 95% CI = 95% confidence interval; OR = Odds Ratio. The proportion of variance explained by the random effects ( $\tau_{00 ID}$ ) for the Null and Fixed Effect model are 95.20% and 99.10%, respectively.

**Table S5***Demographics by Reading Confidence and Language Speaker Status*

| Variable                          | Monolingual English |     |                |     | Multilingual Learners |     |                |     |
|-----------------------------------|---------------------|-----|----------------|-----|-----------------------|-----|----------------|-----|
|                                   | High Confidence     |     | Low Confidence |     | High Confidence       |     | Low Confidence |     |
|                                   | <i>N</i>            | %   | <i>N</i>       | %   | <i>N</i>              | %   | <i>N</i>       | %   |
| Total                             | 202                 |     | 47             |     | 28                    |     | 11             |     |
| Gender                            |                     |     |                |     |                       |     |                |     |
| Female                            | 155                 | 77% | 40             | 86% | 20                    | 71% | 5              | 45% |
| Male                              | 46                  | 23% | 6              | 13% | 7                     | 25% | 6              | 55% |
| Other                             | 1                   | .5% | 1              | 2%  | 1                     | 4%  | 0              | 0%  |
| Race/Ethnicity                    |                     |     |                |     |                       |     |                |     |
| Caucasian American/White/European | 106                 | 52% | 27             | 57% | 4                     | 14% | 0              | 0%  |
| Black/African American            | 68                  | 34% | 16             | 34% | 2                     | 7%  | 0              | 0%  |
| Hispanic/LatinX                   | 10                  | 5%  | 1              | 2%  | 10                    | 36% | 5              | 45% |
| Asian/Asian American              | 6                   | 3%  | 1              | 2%  | 11                    | 39% | 4              | 36% |
| Middle Eastern                    | 2                   | 1%  | 0              | 0%  | 1                     | 4%  | 2              | 18% |
| Other                             | 4                   | 2%  | 2              | 4%  | 0                     | 0%  | 0              | 0%  |
| No Response                       | 6                   | 3%  | 0              | 0%  | 0                     | 0%  | 0              | 0%  |
| Year in College                   |                     |     |                |     |                       |     |                |     |
| 1 <sup>st</sup>                   | 119                 | 59% | 29             | 62% | 12                    | 43% | 7              | 63% |
| 2 <sup>nd</sup>                   | 29                  | 14% | 9              | 19% | 9                     | 32% | 1              | 9%  |
| 3 <sup>rd</sup>                   | 30                  | 15% | 5              | 11% | 4                     | 14% | 1              | 9%  |
| 4 <sup>th</sup>                   | 24                  | 12% | 4              | 9%  | 3                     | 11% | 2              | 18% |

**Table S6***Wilcoxon Rank-Sum Comparisons of English Exposure Rate among Multilingual Learners*

| Group Comparison                      | <i>N</i> | <i>M</i> | <i>SD</i> | Mean Rank | Sum of Ranks | <i>z</i> | <i>P-Value</i> |
|---------------------------------------|----------|----------|-----------|-----------|--------------|----------|----------------|
| Multilingual Learner, High Confidence | 28       | .71      | .25       | 25.36     | 406          | -2.39    | 0.764          |
| Multilingual Learner, Low Confidence  | 11       | .71      | .22       | 19.09     | 66           |          |                |

*Note.* *N* = number of participants; *M* = mean; *SD* = Standard Deviation; *z* = z-score.
